# Supplementary material for: Recovery of the Peptidoglycan Turnover Product Released by the Autolysin Atl in Staphylococcus aureus Involves the Phosphotransferase System Transporter MurP and the Novel 6-phospho-N-acetylmuramidase MupG
Source: PubMed Central journal article supplement (PMC6262408; doi:10.3389/fmicb.2018.02725), 2018-11-16
Supplement: Data_Sheet_1.pdf [file Data_Sheet_1.pdf]

## *Supplementary Material*

# **Recovery of the Peptidoglycan Turnover Product Released by the Autolysin Atl in *Staphylococcus aureus* Involves the Phosphotransferase System Transporter MurP and the Novel 6-phospho-*N*-acetylmuramidase MupG**

**Robert Maria Kluj, Patrick Ebner, Martina Adamek, Nadine Ziemert, Christoph Mayer\* and Marina Borisova\***

\* **Correspondence:** Christoph Mayer: christoph.mayer@uni-tuebingen.de  
Marina Borisova: marina.borisova@uni-tuebingen.de

## **1 Supplementary Data**

### **Generation of markerless $\Delta mupG$ and $\Delta mupGmurQ$ mutants**

The markerless *S. aureus* USA300 JE2  $\Delta mupG$  and  $\Delta mupG\Delta murQ$  mutants were generated by amplifying an about 1000 bp fragment upstream of *SAUSA300\_0192* (*mupG*) gene (primer pair RK-2 and RK-3 for  $\Delta mupG$  and primer pair RK-2 and RK-6 for *Sa*  $\Delta mupGmurQ$ ; see supplementary Table 1 for a complete list of primers) and an about 1100 bp fragment downstream of *mupG* (primers RK-4 and RK-5 for  $\Delta mupG$  and RK-7 and RK-8 for  $\Delta mupGmurQ$ ) using genomic DNA. Shuttle vector pBASE6 (Geiger et al., 2012) was linearized with EcoRV and the three fragments were ligated by Gibson assembly (Gibson et al., 2009). Chemically competent *E. coli* DH5 $\alpha$  cells, growing on LB with ampicillin were controlled for correct pBASE6-*mupG*\_del and pBASE6-*mupGmurQ*\_del plasmid DNA sequence by colony PCR and sequencing (MWG Eurofins). Furthermore, *E. coli*

DC10B cells that lack *dcm* methylation and therefore allow direct plasmid transfer into *S. aureus*, were transformed with pBASE6-*mupG*\_del and pBASE6-*mupGmurQ*\_del plasmids and successful transformants were selected by growth on LB with ampicillin.

Electrocompetent *S. aureus* cells were transformed as described (Löfblom et al., 2007) with 1 - 2 µg DNA (1 mm cuvette, 23 kV/cm) and after electroporation, warm BM medium was added to the cells. Transformed cells were further incubated for 2 h at 37°C and finally plated on BM agar supplemented with 10 µg/ml chloramphenicol.

The suicide-integration vector pBASE6 allows anhydrotetracycline-inducible expression of *secY* antisense RNA for counter-selection against the plasmid (Geiger et al., 2012). The deletion of *mupG* respectively *mupGmurQ* was further conducted as described previously (Bae and Schneewind, 2006; Geiger et al., 2012). The correct sequence of the obtained markerless mutants was verified by colony PCR and sequencing.

### **MupG complementation**

*S. aureus* USA300 JE2  $\Delta$ *mupG* mutant was complemented *in trans* using the *E. coli* - *S. aureus* shuttle vector pCtufamp (Ebner et al., 2015), which constitutively expresses the *mupG* gene under control of the *tufA* promoter. The gene *mupG* was amplified from USA300 JE2 genomic DNA using primers RK-26 and RK-27. The pCtufamp plasmid was linearized with *PacI* and *HindIII* restriction enzyme and cloning with the *mupG* PCR product was achieved using Gibson assembly (Gibson et al., 2009). Successful *E. coli* DH5 $\alpha$  pCtufamp-*mupG* transformants were selected by ampicillin resistance and the correct DNA sequence of the plasmid was confirmed by restriction analysis and sequencing. Plasmid pCtufamp-*mupG* was isolated from DH5 $\alpha$  cells and further introduced in DC10B cells to allow direct transformation of DNA from *E. coli* into *S. aureus* USA300  $\Delta$ *mupG* mutant strain. Electroporation of the plasmid pCtufamp-*mupG* into *S. aureus* cells was performed as previously described in the material and method section. *S. aureus* transformants were selected by chloramphenicol resistance and the presence of the complementation plasmid was verified by colony PCR.

## 2 Supplementary Figures and Tables

### 2.1 Supplementary Figures

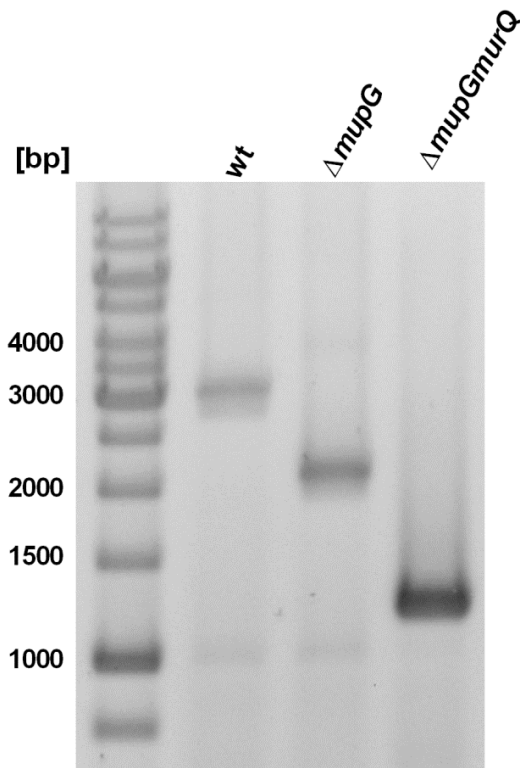

**Supplementary Figure 1. PCR controls of mutants, generated in this study.** Genomic DNA was isolated from *S. aureus* JE2 wild type strain (wt),  $\Delta mupG$  (formerly designated as *S. aureus*  $\Delta SAUSA\_0192$ ) cells, as well from  $\Delta mupGmurQ$  ( $\Delta SAUSA\_0192-0193$ ) cells. Chromosomal regions of interest were amplified by PCR, using primer pair RK-2/RK-5 listed in the Supplementary Table 1 of the supplementary material, and the expected sizes of the PCR products in base pairs (bp) were as indicated: wt - 3137 bp,  $\Delta mupG$  - 2105 bp, and  $\Delta mupGmurQ$  - 1200 bp.

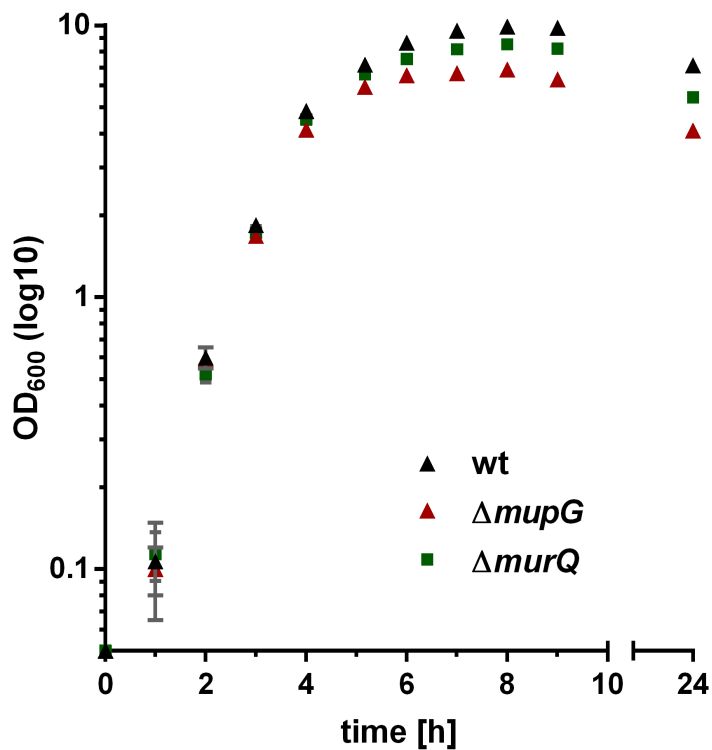

**Supplementary Figure 2. Growth kinetics of *S. aureus* wild type and peptidoglycan recycling mutants in LB medium.** Wild type (wt, black triangles),  $\Delta mupG$  mutant (red triangle), and  $\Delta murQ$  mutant cells (green squares) were grown in LB medium under constant shaking and the optical density was monitored at 600 nm (OD<sub>600</sub>) for up to 24 h. The experiment was performed in triplicates and data were presented in Prism 6 as mean  $\pm$  SD.

**A**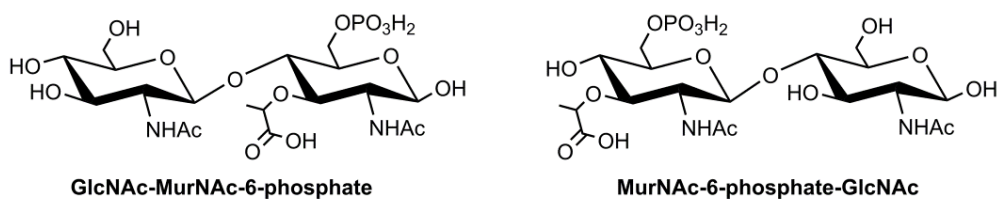

Exact mass: 576.157

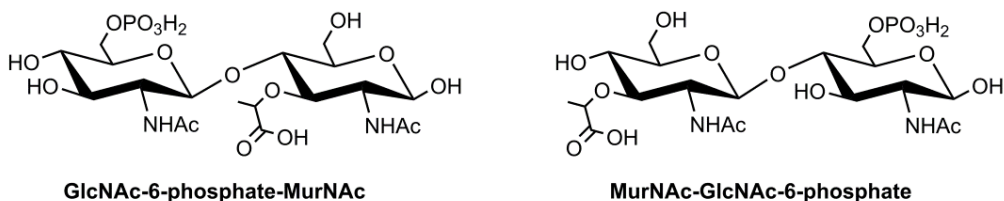**B**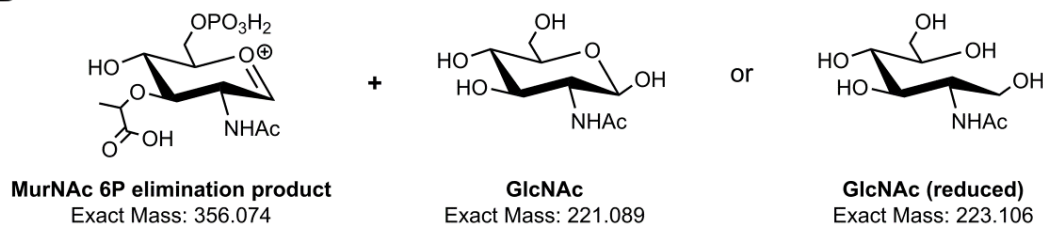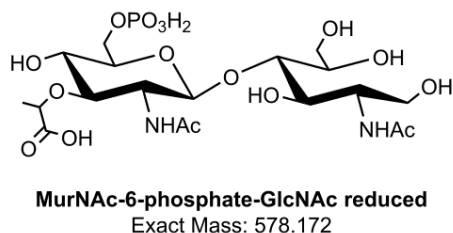

**Supplementary Figure 3. Chemical structures of phosphorylated disaccharides composed of GlcNAc and MurNAc and MS fragmentation products.** (A) A compound accumulates in  $\Delta\text{mupG}$  cells with a monoisotopic molecular mass (exact mass) of 576.157 Da, which corresponds to a phosphorylated disaccharide consisting of GlcNAc and MurNAc sugars. Reduction of the compound with  $\text{NaBH}_4$  at the reducing end indicated that the disaccharide is not phosphorylated at position C1. Assuming phosphorylation at the C6 position, the depicted four different structures are possible structures of the compound. (B) Obtained mass spectra fragmentation pattern of MurNAc 6P-GlcNAc, after reduction of the  $\Delta\text{mupG}$  cytosolic fraction with  $\text{NaBH}_4$  and structure of MurNAc 6P-GlcNAc after reduction with  $\text{NaBH}_4$ .

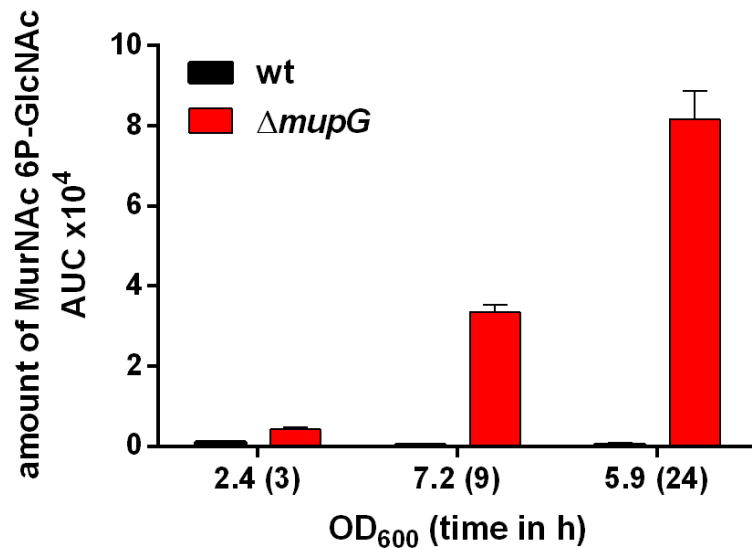

**Supplementary Figure 4. Growth phase-dependent accumulation of MurNAc 6P-GlcNAc.** *S. aureus* wild type (wt) and  $\Delta mupG$  cells were grown in LB medium for 3 h (OD<sub>600</sub> of ~2.4), 9 h (OD<sub>600</sub> of ~7.2) and 24 h (OD<sub>600</sub> of ~5.9) and the same cell number was adjusted for all growth phases. Cytosolic fractions were generated and analyzed by LC-MS in negative ion-mode. Based on the extracted ion chromatographs (EIC) for MurNAc 6P-GlcNAc (observed mass of (M+H)<sup>-</sup> = 575.149 m/z), amounts of this compound were determined by calculating the area under the curve (AUC) for the corresponding EIC.

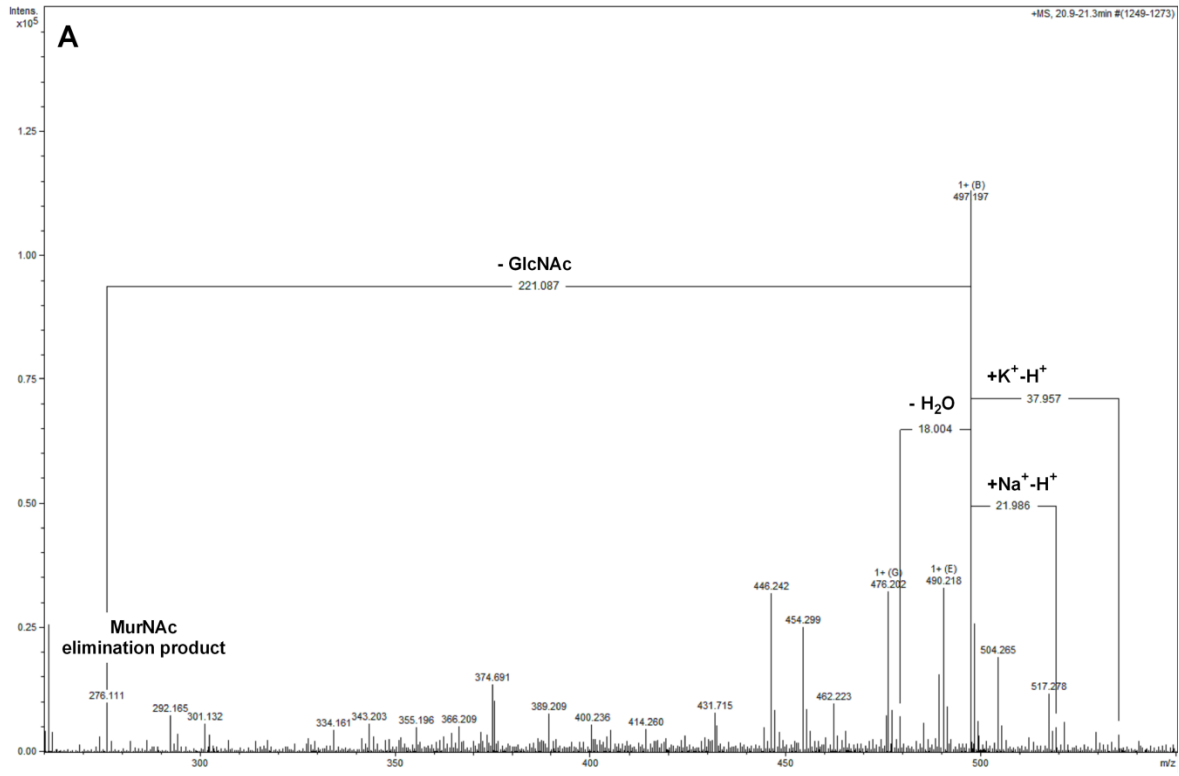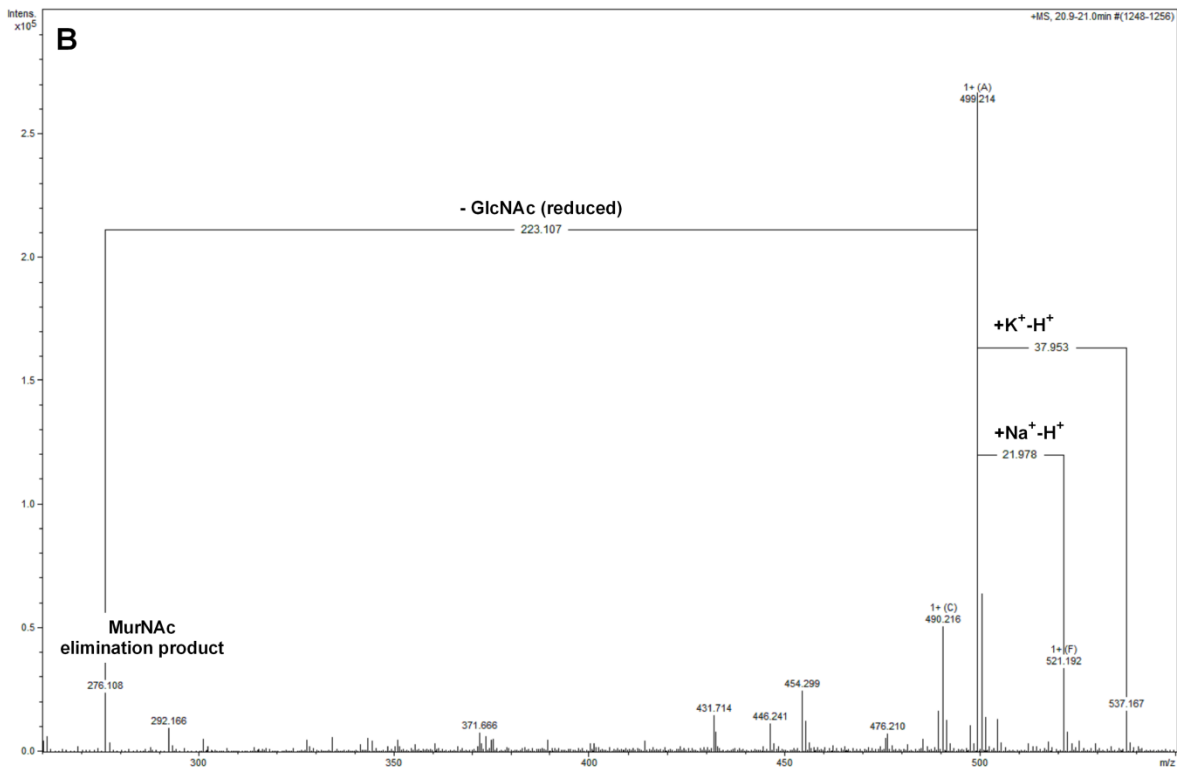

**Supplementary Figure 5. Accumulation of MurNAc-GlcNAc in the growth medium of MurP transporter mutants.** *S. aureus* wild type (wt), *murP* transporter mutant (*murP::Tn*) and *murQ*-operon mutant ( $\Delta mupGmurQPR$ ) were cultured to stationary phase and the culture medium was prepared prior to LC-MS measurement (positive ion-mode) as described in the legend of figure 6. The culture medium was analyzed for the accumulation of compounds present in both mutants, which were absent in the wt strain. A compound with an observed mass of  $(M+H)^+ = 497.197$  m/z accumulates specifically in the supernatant of *mupP::Tn* cells and with an observed mass of 497.195 m/z in the *murQ*-operon cells. After reduction of both samples with NaBH<sub>4</sub>, this compound diminished and a new compound with a mass of  $(M+H)^+ = 499.214$  m/z was generated. The mass spectra fragmentation pattern and adducts for the compound before and after reduction, presented in Compass DataAnalysis program (Bruker) from 200 to 600 m/z, indicated that the culture supernatant of both MurP transporter mutants contains MurNAc-GlcNAc and not GlcNAc-MurNAc disaccharide.



## 2.2 Supplementary Tables

**Supplementary Table 1. Oligonucleotides used in this study**

| <b>Primer</b> | <b>Sequence (5'-3')</b>                                      | <b>Application</b>                          |
|---------------|--------------------------------------------------------------|---------------------------------------------|
| RK-2          | cgcgcatctgtcgacgatatCACCTGTTTGTAATGTTGGG                     | deletion of <i>mupG</i> and <i>mupGmurQ</i> |
| RK-3          | actccctagtCAAAGTAGCCCTCCTTAACAATATAATTATTAG                  | deletion of <i>mupG</i>                     |
| RK-4          | ggctactttgACTAGGGAGTGTAAGAAGTG                               | deletion of <i>mupG</i>                     |
| RK-5          | tgcagcatgcaagcttgatCGTGTATAACACCCATGACAC                     | deletion of <i>mupG</i>                     |
| RK-6          | aaggtgtctCAAAGTAGCCCTCCTTAACAATATAATTATTAG                   | deletion of <i>mupGmurQ</i>                 |
| RK-7          | ggctactttgAGACAACCTTAGGAGGGATTTAAATGACCAAAG                  | deletion of <i>mupGmurQ</i>                 |
| RK-8          | tgcagcatgcaagcttgataTCCAGCACCAGCCATCGCTG                     | deletion of <i>mupGmurQ</i>                 |
| RK-26         | agagttcgaggagg <u>tttaattaa</u> TGACAGGCTTTTCAGTGTATTAG      | cloning of <i>mupG</i> in pCtufamp          |
| RK-27         | gtctattattaagtacttcagcta <u>attaagctt</u> TCACTTCTTACTCCCTAG | cloning of <i>mupG</i> in pCtufamp          |
| MB-67         | <u>ggccatggga</u> ACAGGCTTTTCAGTGTATTAGGA                    | cloning of <i>mupG</i> in pET28a            |
| MB-68         | <u>ggctcgag</u> CTTCTTACTCCCTAGTTT                           | cloning of <i>mupG</i> in pET28a            |

*Recognitions sites of restriction enzymes underlined*

**Supplementary Table 2. Plasmids and strains used in the study**

| Strains and plasmids                                                    | Description/Application                                                                                                                             | Reference/Source           |
|-------------------------------------------------------------------------|-----------------------------------------------------------------------------------------------------------------------------------------------------|----------------------------|
| <b>Plasmids</b>                                                         |                                                                                                                                                     |                            |
| pBASE6                                                                  | <i>Escherichia coli</i> - <i>Staphylococcus aureus</i> temperature-sensitive suicide shuttle vector, Amp <sup>r</sup> , Cam <sup>r</sup>            | (Geiger et al., 2012)      |
| pBASE6- <i>mupG</i> _del                                                | pBASE suicide integration vector for deletion of <i>SAUSA300_0192 (mupG)</i> , Amp <sup>r</sup> , Cam <sup>r</sup>                                  | this study                 |
| pBASE6- <i>mupGmurQ</i> _del                                            | pBASE6 suicide integration vector for deletion of <i>SAUSA300_0192 (mupG)</i> and <i>SAUSA300_0193 (murQ)</i> , Amp <sup>r</sup> , Cam <sup>r</sup> | this study                 |
| pET28a (+)                                                              | <i>E. coli</i> expression vector, C-terminal 6x His, Kan <sup>r</sup>                                                                               | Novagen                    |
| pET28a- <i>mupG</i>                                                     | Cloning of <i>SAUSA300_0192 (mupG)</i> in pET28a, Kan <sup>r</sup>                                                                                  | this study                 |
| pCtufamp                                                                | <i>E. coli</i> - <i>S. aureus</i> shuttle vector, Amp <sup>r</sup> , Cam <sup>r</sup>                                                               | (Ebner et al., 2015)       |
| pCtufamp- <i>mupG</i>                                                   | Cloning of <i>SAUSA300_0192 (mupG)</i> in pCtufamp, Amp <sup>r</sup> , Cam <sup>r</sup>                                                             | this study                 |
| <b>Strains</b>                                                          |                                                                                                                                                     |                            |
| <i>E. coli</i> DH5a                                                     | <i>SupE44 hsdR17 recA1 endA1 gyrA96 thi-1 relA1</i>                                                                                                 | (Hanahan, 1983)            |
| <i>E. coli</i> DH5a pET28a- <i>mupG</i>                                 | DH5a cells transformed with pET28a- <i>mupG</i> , Kan <sup>r</sup>                                                                                  | this study                 |
| <i>E. coli</i> DH5a pCtufamp- <i>mupG</i>                               | DH5a cells transformed with pCtufamp- <i>mupG</i> , Amp <sup>r</sup>                                                                                | this study                 |
| <i>E. coli</i> BL21(DE3)                                                | F <sup>-</sup> <i>ompT hsdS<sub>B</sub>(r<sub>B</sub><sup>-</sup> m<sub>B</sub><sup>-</sup>) gal dcm</i> (DE3)                                      | (Studier and Moffat, 1986) |
| <i>E. coli</i> BL21(DE3) pET28a- <i>mupG</i>                            | Heterologous expression of recombinant <i>S. aureus</i> USA300 JE2 <i>mupG</i> , Kan <sup>r</sup>                                                   | this study                 |
| <i>E. coli</i> DC10B                                                    | <i>E. coli</i> DH10B $\Delta$ <i>dcm</i>                                                                                                            | (Monk et al., 2012)        |
| <i>E. coli</i> DC10B pBASE6                                             | DC10B cells transformed with pBASE6, Amp <sup>r</sup>                                                                                               | Friedrich Götz laboratory  |
| <i>E. coli</i> DC10B pBASE6- <i>mupG</i> _del                           | DC10B cells transformed with pBASE6- <i>mupG</i> _del, Amp <sup>r</sup>                                                                             | this study                 |
| <i>E. coli</i> DC10B pBASE6- <i>mupGmurQ</i> _del                       | DC10B cells transformed with pBASE6- <i>mupGmurQ</i> _del, Amp <sup>r</sup>                                                                         | this study                 |
| <i>E. coli</i> DC10B pCtufamp                                           | DC10B cells transformed with pCtufamp, Amp <sup>r</sup>                                                                                             | (Ebner et al., 2015)       |
| <i>E. coli</i> DC10B pCtufamp- <i>mupG</i>                              | DC10B cells transformed with pCtufamp- <i>mupG</i> , Amp <sup>r</sup>                                                                               | this study                 |
| <i>S. aureus</i> USA300 JE2                                             | USA300 LAC, cured for 3 plasmids for antibiotic resistance, parental strain                                                                         | (Fey et al., 2013)         |
| <i>S. aureus</i> $\Delta$ <i>mupG</i>                                   | Markerless <i>SAUSA300_0192 (mupG)</i> deletion mutant of JE2                                                                                       | this study                 |
| <i>S. aureus</i> $\Delta$ <i>mupGmurQ</i>                               | Markerless <i>SAUSA300_0192 (mupG)</i> and <i>SAUSA300_0193 (murQ)</i> deletion mutant of JE2                                                       | this study                 |
| <i>S. aureus murP::Tn</i>                                               | <i>Bursa aurealis</i> transposon <i>SAUSA300_0194 (murP)</i> insertion mutant of JE2                                                                | (Fey et al., 2013)         |
| <i>S. aureus</i> $\Delta$ <i>murQ</i>                                   | Markerless <i>SAUSA300_0193</i> deletion mutant of JE2                                                                                              | (Borisova et al., 2016)    |
| <i>S. aureus</i> $\Delta$ <i>mupGmurQPR</i> ( $\Delta$ <i>murQ</i> -op) | Markerless <i>SAUSA300_0192-SAUSA300_0195</i> deletion mutant of JE2                                                                                | (Borisova et al., 2016)    |
| <i>S. aureus</i> $\Delta$ <i>mupG</i> pCtufamp                          | JE2 $\Delta$ <i>mupG</i> transformed with pCtufamp, Cam <sup>r</sup>                                                                                | this study                 |
| <i>S. aureus</i> $\Delta$ <i>mupG</i> pCtufamp- <i>mupG</i>             | JE2 $\Delta$ <i>mupG</i> transformed with pCtufamp- <i>mupG</i> , Cam <sup>r</sup>                                                                  | this study                 |

**Supplementary Table 3. List of species containing putative MupG orthologous and MupG-like proteins (included in the phylogenetic tree, Figure 8 main text)**

| <b>Tax ID</b> | <b>Scientific name of species</b>                 | <b>Accession number (uniprot ID)</b> | <b>Protein length (AA)</b> |
|---------------|---------------------------------------------------|--------------------------------------|----------------------------|
| 592010        | <i>Abiotrophia defectiva</i> ATCC 49176           | W1Q1H1                               | 342                        |
| 1009370       | <i>Acetonema longum</i> DSM 6540                  | F7NMV1                               | 363                        |
|               |                                                   | F7NNS1                               | 361                        |
| 591001        | <i>Acidaminococcus fermentans</i> DSM 20731       | D2RNC1                               | 356                        |
| 568816        | <i>Acidaminococcus intestini</i> RyC-MR95         | G4Q715                               | 354                        |
| 933801        | <i>Acidianus hospitalis</i> W1                    | F4B5C6                               | 211                        |
|               |                                                   | F4B5E0                               | 345                        |
| 111015        | <i>Actinomyces radidentis</i>                     | A0A0X8JDX3                           | 350                        |
| 866775        | <i>Aerococcus urinae</i> ACS-120-V-Col10a         | F2I6S4                               | 362                        |
| 655812        | <i>Aerococcus viridans</i> ATCC 11563 = CCUG 4311 | D4YE07                               | 353                        |
| 1229520       | <i>Alkalibacterium</i> sp. AK22                   | A0A011QTR6                           | 361                        |
| 525254        | <i>Anaerococcus lactolyticus</i> ATCC 51172       | C2BGB9                               | 361                        |
| 525919        | <i>Anaerococcus prevotii</i> DSM 20548            | C7REF0                               | 329                        |
| 655811        | <i>Anaerococcus vaginalis</i> ATCC 51170          | C7HW89                               | 332                        |
| 861450        | <i>Anaeroglobus geminatus</i> F0357               | G9YK66                               | 359                        |
| 1794912       | <i>Anaerosporomusa subterranea</i>                | A0A154BSE5                           | 358                        |
| 82374         | <i>Anaerovibrio lipolyticus</i>                   | A0A0B2JRX6                           | 359                        |
| 1490057       | <i>Anoxybacillus</i> sp. B7M1                     | A0A160FCK4                           | 357                        |
| 997872        | <i>Atopobium minutum</i> 10063974                 | N2BKM7                               | 364                        |
| 521095        | <i>Atopobium parvulum</i> DSM 20469               | C8W835                               | 351                        |
|               |                                                   | C8W890                               | 364                        |
| 553184        | <i>Atopobium rimae</i> ATCC 49626                 | B9CLC8                               | 368                        |
| 525256        | <i>Atopobium vaginae</i> DSM 15829                | F1T5I2                               | 365                        |
|               |                                                   | F1T6R7                               | 360                        |
| 866774        | <i>Atopobium vaginae</i> PB189-T1-4               | E1L2A4                               | 381                        |
| 1637974       | <i>Bacilli bacterium</i> VT-13-104                | A0A0K0G9A4                           | 360                        |
| 1392          | <i>Bacillus anthracis</i>                         | Q81UN9                               | 354                        |
|               |                                                   | Q81UR7                               | 361                        |
|               |                                                   | Q81US3                               | 362                        |
| 1117379       | <i>Bacillus bataviensis</i> LMG 21833             | K6E9W9                               | 335                        |
| 1408103       | <i>Bacillus campisalis</i>                        | A0A0M2T4I8                           | 346                        |
| 226900        | <i>Bacillus cereus</i> ATCC 14579                 | Q81HG9                               | 357                        |
|               |                                                   | Q81HJ5                               | 361                        |
|               |                                                   | Q81HK1                               | 362                        |
| 526986        | <i>Bacillus cereus</i> Rock3-44                   | C2W4D9                               | 362                        |
|               |                                                   | C2WFY5                               | 363                        |
| 526988        | <i>Bacillus cereus</i> Rock4-18                   | C2WYP2                               | 362                        |
|               |                                                   | C2WYP7                               | 361                        |

|         |                                        |            |     |
|---------|----------------------------------------|------------|-----|
|         |                                        | C2WYS6     | 353 |
| 1397    | <i>Bacillus circulans</i>              | A0A0J1IPX4 | 337 |
| 66692   | <i>Bacillus clausii</i> KSM-K16        | Q5WBR3     | 361 |
|         |                                        | Q5WLA0     | 352 |
| 345219  | <i>Bacillus coagulans</i> 36D1         | G2THA2     | 361 |
|         |                                        | G2TKE3     | 359 |
| 315749  | <i>Bacillus cytotoxicus</i> NVH 391-98 | A7GLJ0     | 362 |
|         |                                        | A7GLL6     | 356 |
| 1402860 | <i>Bacillus enclensis</i>              | A0A0V8HQC0 | 356 |
| 272558  | <i>Bacillus halodurans</i> C-125       | Q9K701     | 351 |
| 246786  | <i>Bacillus indicus</i>                | A0A084H2K9 | 336 |
| 1367477 | <i>Bacillus infantis</i> NRRL B-14911  | U5LE36     | 337 |
| 284581  | <i>Bacillus koreensis</i>              | A0A0M0KW11 | 336 |
| 1246626 | <i>Bacillus lehensis</i> G1            | A0A060LN41 | 350 |
| 1679170 | <i>Bacillus loiseleuriae</i>           | A0A0K9GRV8 | 358 |
|         |                                        | A0A0K9GW51 | 361 |
| 574376  | <i>Bacillus manliponensis</i>          | A0A073JVS4 | 355 |
| 189381  | <i>Bacillus marisflavi</i>             | A0A0M0G1B4 | 337 |
|         |                                        | A0A0M0G3W2 | 363 |
| 545693  | <i>Bacillus megaterium</i> QM B1551    | D5DXW9     | 362 |
|         |                                        | D5E232     | 336 |
| 398511  | <i>Bacillus pseudofirmus</i> OF4       | D3FRN2     | 360 |
| 1321606 | <i>Bacillus selenatarsenatis</i> SF-1  | A0A0A8X7B9 | 361 |
| 157838  | <i>Bacillus shackletonii</i>           | A0A0Q3WSN9 | 355 |
| 1479    | <i>Bacillus smithii</i>                | A0A0H4P0T1 | 357 |
| 665959  | <i>Bacillus</i> sp. 2_A_57_CT2         | E5WFS1     | 355 |
| 1476857 | <i>Bacillus</i> sp. B-jedd             | A0A098F632 | 354 |
| 1581033 | <i>Bacillus</i> sp. FJAT-21945         | A0A0M0WAQ0 | 361 |
| 1581037 | <i>Bacillus</i> sp. FJAT-22058         | A0A0M1NM28 | 336 |
|         |                                        | A0A0M1NN47 | 360 |
|         |                                        | A0A0M1NXK1 | 367 |
| 1712029 | <i>Bacillus</i> sp. FJAT-25509         | A0A0Q3SIR4 | 364 |
|         |                                        | A0A0Q3SJA6 | 362 |
|         |                                        | A0A0Q3TR97 | 375 |
|         |                                        | A0A0Q3VY92 | 363 |
|         |                                        | A0A0Q3WA13 | 354 |
| 1460639 | <i>Bacillus</i> sp. JCM 19045          | W7Z9H7     | 352 |
| 1811976 | [ <i>Bacillus</i> ] sp. KCTC 13219     | A0A150YL91 | 360 |
| 1455638 | <i>Bacillus</i> sp. SA1-12             | A0A0M2PAQ4 | 339 |
| 1414648 | <i>Bacillus</i> sp. SGD-V-76           | A0A0V8JJX2 | 337 |
| 1423321 | <i>Bacillus</i> sp. SJS                | A0A176J169 | 338 |
| 46224   | <i>Bacillus sporothermodurans</i>      | A0A150KK53 | 362 |
|         |                                        | A0A150L6B6 | 355 |
| 35841   | <i>Bacillus thermoamylovorans</i>      | A0A090IYV8 | 357 |
| 218284  | <i>Bacillus vietnamensis</i>           | A0A0P6VV75 | 365 |
|         |                                        | A0A0P6WPF6 | 343 |

|         |                                                           |            |     |
|---------|-----------------------------------------------------------|------------|-----|
| 1131730 | <i>Bacillus vireti</i> LMG 21834                          | W1SAN2     | 333 |
|         |                                                           | W1SH02     | 362 |
| 1235279 | <i>Bhargavaea cecembensis</i> DSE10                       | M7NA07     | 359 |
| 1432657 | <i>Borrelia duttonii</i> CR2A                             | W6TX00     | 365 |
| 224326  | <i>Borrelia burgdorferi</i> B31                           | O50983     | 365 |
| 1262760 | <i>Brachyspira</i> sp. CAG:700                            | R5LFE6     | 360 |
|         |                                                           | R5M021     | 360 |
| 1042163 | <i>Brevibacillus laterosporus</i> LMG 15441               | A0A075RA01 | 362 |
| 1265861 | <i>Brochothrix campestris</i> FSL F6-1037                 | W7CPL6     | 348 |
|         |                                                           | W7CQR3     | 361 |
| 1121126 | <i>Brochothrix thermosphacta</i> DSM 20171 = FSL F6-1036  | W7CBN2     | 348 |
|         |                                                           | W7CL20     | 362 |
| 301148  | <i>Caldibacillus debilis</i>                              | A0A150MCP7 | 354 |
| 397948  | <i>Caldivirga maquilingensis</i> IC-167                   | A8MAC8     | 356 |
| 1714254 | <i>Caldivirga</i> sp. JCHS_4                              | A0A101XFL3 | 356 |
| 1156417 | <i>Caloranaerobacter azorensis</i> H53214                 | A0A096CWF3 | 363 |
| 1029718 | <i>Candidatus Arthromitus</i> sp. SFB-mouse-Japan         | F9VK14     | 364 |
| 1574263 | <i>Candidatus Stoquefichus</i> sp. KLE1796                | A0A139T806 | 362 |
|         |                                                           | A0A139TFC3 | 383 |
|         |                                                           | A0A139TL24 | 362 |
| 1449336 | <i>Carnobacterium divergens</i> DSM 20623                 | A0A0R2HWL4 | 362 |
|         |                                                           | A0A0R2HXR1 | 363 |
|         |                                                           | A0A0R2HYC1 | 355 |
| 1266845 | <i>Carnobacterium inhibens</i> subsp. <i>gilichinskyi</i> | U5S9F2     | 358 |
| 1234679 | <i>Carnobacterium maltaromaticum</i> LMA28                | K8E2H1     | 354 |
|         |                                                           | K8E3C8     | 366 |
|         |                                                           | K8EEA3     | 362 |
|         |                                                           | K8EHX2     | 363 |
|         |                                                           | K8EUW3     | 362 |
| 1564681 | <i>Carnobacterium</i> sp. CP1                             | A0A0U3E833 | 361 |
|         |                                                           | A0A0U3PMV6 | 354 |
| 1234409 | <i>Catelicoccus marimammalium</i> M35/04/3                | K8Z886     | 363 |
| 1262767 | <i>Catenibacterium</i> sp. CAG:290                        | R7GHT6     | 363 |
| 1319815 | <i>Cetobacterium somerae</i> ATCC BAA-474                 | U7V6E0     | 361 |
| 1734399 | <i>Clostridia bacterium</i> BRH_c25                       | A0A101WH66 | 361 |
|         |                                                           | A0A101WNU7 | 346 |
|         |                                                           | A0A124IQ14 | 374 |
| 457421  | <i>Clostridiales bacterium</i> 1_7_47FAA                  | C5EV19     | 364 |
| 1497955 | <i>Clostridiales bacterium</i> KA00274                    | A0A133YCB3 | 366 |
| 1321778 | <i>Clostridiales bacterium</i> oral taxon 876 str. F0540  | U2DBE3     | 360 |
|         |                                                           | U2DDN0     | 362 |
|         |                                                           | U2ERE0     | 364 |
| 272563  | <i>Clostridioides difficile</i> 630                       | Q181P6     | 364 |
|         |                                                           | Q184N8     | 365 |
| 1418104 | <i>Clostridium argentinense</i> CDC 2741                  | A0A0C1R1D8 | 360 |
| 518636  | [ <i>Clostridium</i> ] <i>asparagiforme</i> DSM 15981     | C0D5D6     | 379 |

|         |                                                       |            |     |
|---------|-------------------------------------------------------|------------|-----|
|         |                                                       | C0D9V7     | 365 |
| 1415775 | <i>Clostridium baratii</i> str. Sullivan              | A0A0A7FVD6 | 363 |
|         |                                                       | A0A0A7FVZ5 | 359 |
| 290402  | <i>Clostridium beijerinckii</i> NCIMB 8052            | A6LUQ9     | 357 |
|         |                                                       | A6LWT3     | 383 |
| 1263064 | <i>Clostridium bolteae</i> CAG:59                     | R5F7I6     | 364 |
| 441771  | <i>Clostridium botulinum</i> A str. Hall              | A5I1I0     | 358 |
|         |                                                       | A5I779     | 361 |
| 935198  | <i>Clostridium botulinum</i> B str. Eklund 17B (NRP)  | B2TJW3     | 364 |
|         |                                                       | B2TPX0     | 348 |
| 632245  | <i>Clostridium butyricum</i> E4 str. BoNT E BL5262    | C4IBH5     | 360 |
|         |                                                       | C4IEN6     | 362 |
| 545697  | <i>Clostridium celatum</i> DSM 1785                   | L1QKV7     | 364 |
| 717608  | [ <i>Clostridium</i> ] cf. <i>saccharolyticum</i> K10 | D6DDJ6     | 363 |
| 1263065 | <i>Clostridium clostridioforme</i> CAG:132            | R6JX67     | 364 |
| 999411  | <i>Clostridium colicanis</i> 209318                   | N9XJC8     | 365 |
|         |                                                       | N9XYQ8     | 363 |
| 1263067 | <i>Clostridium hathewayi</i> CAG:224                  | R5T0A6     | 356 |
| 1294142 | <i>Clostridium intestinale</i> URNW                   | U2NJS4     | 362 |
| 610130  | [ <i>Clostridium</i> ] <i>saccharolyticum</i> WM1     | D9QZR8     | 349 |
|         |                                                       | D9R406     | 364 |
|         |                                                       | D9R9Q7     | 363 |
| 457396  | <i>Clostridium</i> sp. 7_2_43FAA                      | V9H2C9     | 359 |
|         |                                                       | V9HEP5     | 364 |
|         |                                                       | V9HEV0     | 363 |
| 1354301 | <i>Clostridium</i> sp. BL8                            | T0NCG8     | 362 |
| 641107  | <i>Clostridium</i> sp. DL-VIII                        | G7MCB4     | 362 |
| 747377  | <i>Clostridium</i> sp. DMHC 10                        | A0A0L8EYU2 | 364 |
| 1609975 | <i>Clostridium</i> sp. FS41                           | A0A0F0CI11 | 371 |
| 1226325 | <i>Clostridium</i> sp. KLE 1755                       | U2CQ75     | 361 |
| 1196322 | <i>Clostridium</i> sp. Maddingley MBC34-26            | K6TV16     | 364 |
| 1230342 | <i>Clostridium tetanomorphum</i> DSM 665              | A0A037Z936 | 361 |
| 1288971 | [ <i>Clostridium</i> ] <i>ultunense</i> Esp           | M1Z6D9     | 318 |
|         |                                                       | M1ZI56     | 362 |
| 521003  | <i>Collinsella intestinalis</i> DSM 13280             | C4F7L5     | 361 |
|         |                                                       | C4FB87     | 351 |
| 1262850 | <i>Collinsella</i> sp. CAG:166                        | R5ZF55     | 350 |
| 445975  | <i>Collinsella stercoris</i> DSM 13279                | B6G9L1     | 361 |
|         |                                                       | B6G9Q2     | 368 |
| 742742  | <i>Collinsella tanakaei</i> YIT 12063                 | G1WIN1     | 351 |
| 100884  | <i>Coprobacillus cateniformis</i>                     | E7G6Q3     | 358 |
|         |                                                       | E7G898     | 363 |
|         |                                                       | E7G9Z6     | 236 |
|         |                                                       | E7GB41     | 383 |
|         |                                                       | E7GE27     | 389 |
|         |                                                       | E7GG55     | 364 |

|         |                                                    |            |     |
|---------|----------------------------------------------------|------------|-----|
| 1262853 | <i>Coprobacillus</i> sp. CAG:183                   | R5R7X9     | 382 |
| 1262854 | <i>Coprobacillus</i> sp. CAG:235                   | R5Q8K4     | 382 |
|         |                                                    | R5QMK5     | 237 |
| 1262856 | <i>Coprobacillus</i> sp. CAG:698                   | R5FU40     | 303 |
| 700015  | <i>Coriobacterium glomerans</i> PW2                | F2N9Q3     | 360 |
| 1736311 | <i>Curtobacterium</i> sp. Leaf261                  | A0A0Q4V419 | 340 |
| 997346  | <i>Desmospora</i> sp. 8437                         | F5SCB8     | 359 |
| 883103  | <i>Dolosigranulum pigrum</i> ATCC 51524            | H3NEY8     | 343 |
| 999415  | <i>Eggerthia catenaformis</i> OT 569 = DSM 20559   | M2NHB4     | 365 |
| 1158606 | <i>Enterococcus asini</i> ATCC 700915              | R2PPF2     | 363 |
|         |                                                    | R2PYG1     | 363 |
|         |                                                    | R2Q4V5     | 356 |
| 1140002 | <i>Enterococcus avium</i> ATCC 14025               | S0RQJ4     | 363 |
|         |                                                    | S0RWQ6     | 352 |
|         |                                                    | S0RWS1     | 360 |
| 565655  | <i>Enterococcus casseliflavus</i> EC20             | C9A4Q4     | 363 |
|         |                                                    | C9A8H2     | 363 |
|         |                                                    | C9A755     | 356 |
|         |                                                    | C9A9T1     | 354 |
| 1121864 | <i>Enterococcus cecorum</i> DSM 20682 = ATCC 43198 | S1RPS0     | 362 |
| 1121865 | <i>Enterococcus columbae</i> DSM 7374 = ATCC 51263 | S0KY94     | 352 |
| 1139219 | <i>Enterococcus dispar</i> ATCC 51266              | S1N7Z2     | 363 |
|         |                                                    | S1NYV2     | 357 |
| 1260356 | <i>Enterococcus faecalis</i> 13-SD-W-01            | S4CYV8     | 378 |
|         |                                                    | S4D9R3     | 362 |
|         |                                                    | S4DG08     | 353 |
| 226185  | <i>Enterococcus faecalis</i> V583                  | Q831R3     | 369 |
|         |                                                    | Q834U7     | 363 |
|         |                                                    | Q837K1     | 362 |
| 333849  | <i>Enterococcus faecium</i> DO                     | I3TZU2     | 353 |
|         |                                                    | I3U1N4     | 364 |
| 1158608 | <i>Enterococcus haemoperoxidus</i> ATCC BAA-382    | R2QC85     | 362 |
|         |                                                    | R2QQ37     | 364 |
|         |                                                    | R2QWQ2     | 354 |
|         |                                                    | R2TGU6     | 363 |
| 768486  | <i>Enterococcus hirae</i> ATCC 9790                | I6SER8     | 246 |
|         |                                                    | I6SV66     | 358 |
|         |                                                    | I6T3X3     | 362 |
|         |                                                    | I6TD20     | 364 |
| 888064  | <i>Enterococcus italicus</i> DSM 15952             | E6LD00     | 354 |
| 1300150 | <i>Enterococcus mundtii</i> QU 25                  | V5XMS1     | 363 |
|         |                                                    | V5XQ78     | 355 |
|         |                                                    | V5XSW8     | 362 |
| 1158607 | <i>Enterococcus pallens</i> ATCC BAA-351           | R2PXP5     | 362 |
|         |                                                    | R2QLR1     | 380 |
| 1158610 | <i>Enterococcus phoeniculicola</i> ATCC BAA-412    | R3TMD4     | 362 |

|         |                                                                                 |            |     |
|---------|---------------------------------------------------------------------------------|------------|-----|
|         |                                                                                 | R3W9R5     | 362 |
|         |                                                                                 | R3WWH7     | 364 |
| 1139996 | <i>Enterococcus saccharolyticus</i> subsp. <i>saccharolyticus</i><br>ATCC 43076 | S0NIG9     | 363 |
| 1316414 | <i>Enterococcus</i> sp. HSIEG1                                                  | T0U472     | 308 |
|         |                                                                                 | T0U7Y1     | 357 |
|         |                                                                                 | T0VMC0     | 311 |
| 1140003 | <i>Enterococcus sulfureus</i> ATCC 49903                                        | S0LAJ5     | 362 |
|         |                                                                                 | S0P1M4     | 361 |
| 908337  | <i>Eremococcus coleocola</i> ACS-139-V-Col8                                     | E4KR33     | 363 |
| 1514105 | <i>Erysipelothrix larvae</i>                                                    | A0A0X8GZ09 | 362 |
|         |                                                                                 | A0A0X8H0D6 | 360 |
|         |                                                                                 | A0A109UHF6 | 361 |
|         |                                                                                 | A0A109UHQ6 | 362 |
| 650150  | <i>Erysipelothrix rhusiopathiae</i> str. Fujisawa                               | F5WSZ0     | 362 |
|         |                                                                                 | F5WT23     | 345 |
|         |                                                                                 | F5WTW6     | 362 |
| 658659  | <i>Erysipelotrichaceae bacterium</i> 3_1_53                                     | E2SNA2     | 361 |
| 1262981 | <i>Erysipelotrichaceae bacterium</i> CAG:64                                     | R6UPR9     | 361 |
|         |                                                                                 | R6VXC8     | 364 |
| 1263076 | <i>Eubacterium dolichum</i> CAG:375                                             | R7G5E0     | 362 |
| 457402  | <i>Eubacterium</i> sp. 3_1_31                                                   | H1BI77     | 361 |
|         |                                                                                 | H1BM35     | 365 |
| 262543  | <i>Exiguobacterium sibiricum</i> 255-15                                         | B1YFD1     | 357 |
| 360911  | <i>Exiguobacterium</i> sp. AT1b                                                 | C4KZ05     | 349 |
| 883112  | <i>Facklamia ignava</i> CCUG 37419                                              | K1ME59     | 350 |
| 718252  | <i>Faecalibacterium prausnitzii</i> L2-6                                        | D4K1I5     | 349 |
| 1702221 | <i>Faecalibaculum rodentium</i>                                                 | A0A140DXV5 | 362 |
|         |                                                                                 | A0A140DXW3 | 409 |
| 1017270 | <i>Fictibacillus enclensis</i>                                                  | A0A0V8J9B2 | 347 |
| 1196324 | <i>Fictibacillus macauensis</i> ZFHKF-1                                         | I8UHR2     | 363 |
| 1221500 | <i>Fictibacillus phosphorivorans</i>                                            | A0A160IPL6 | 352 |
| 1263004 | <i>Firmicutes bacterium</i> CAG:137                                             | R6H0B3     | 355 |
| 1263017 | <i>Firmicutes bacterium</i> CAG:313                                             | R6YTX6     | 345 |
| 1235796 | <i>Firmicutes bacterium</i> M10-2                                               | R9LSC9     | 395 |
|         |                                                                                 | R9LTA6     | 361 |
| 471223  | <i>Geobacillus</i> sp. WCH70                                                    | C5DAG8     | 356 |
| 638301  | <i>Granulicatella adiacens</i> ATCC 49175                                       | C8NHI2     | 351 |
|         |                                                                                 | C8NHJ0     | 363 |
| 626369  | <i>Granulicatella elegans</i> ATCC 700633                                       | D0BLW8     | 345 |
| 572479  | <i>Halanaerobium praevalens</i> DSM 2228                                        | E3DMW2     | 345 |
| 1033810 | <i>Haloplasma contractile</i> SSD-17B                                           | F7PUD1     | 351 |
| 883114  | <i>Helcococcus kunzii</i> ATCC 51366                                            | H3NM85     | 353 |
| 545696  | <i>Holdemania filiformis</i> DSM 12042                                          | B9Y2X9     | 382 |
| 220754  | <i>Jeotgalibacillus campisalis</i>                                              | A0A0C2VVB6 | 369 |
| 1410657 | <i>Kandleria vitulina</i> DSM 20405                                             | A0A0R2H9W0 | 365 |



|         |                                                                        |            |     |
|---------|------------------------------------------------------------------------|------------|-----|
| 1750719 | <i>Kurthia</i> sp. 11kri321                                            | A0A0X1RVR5 | 342 |
| 936594  | <i>Lachnoanaerobaculum</i> sp. ICM7                                    | J5GBB5     | 365 |
| 397290  | <i>Lachnospiraceae</i> bacterium A2                                    | R9K663     | 393 |
|         |                                                                        | R9K720     | 300 |
| 1600    | <i>Lactobacillus acetotolerans</i>                                     | A0A0D6A1V9 | 346 |
|         |                                                                        | A0A0D6A4Q2 | 364 |
| 272621  | <i>Lactobacillus acidophilus</i> NCFM                                  | Q5FHY1     | 352 |
|         |                                                                        | Q5FIF9     | 353 |
|         |                                                                        | Q5FJQ2     | 363 |
| 1423719 | <i>Lactobacillus algidus</i> DSM 15638                                 | A0A0R1HIN0 | 363 |
| 585524  | <i>Lactobacillus amylolyticus</i> DSM 11664                            | D4YTG1     | 351 |
| 1423721 | <i>Lactobacillus amylophilus</i> DSM 20533 = JCM 1125                  | A0A0R1YGI6 | 216 |
| 1423820 | <i>Lactobacillus aviarius</i> subsp. <i>araffinosus</i> DSM 20653      | A0A0R1ZSA7 | 365 |
| 1423727 | <i>Lactobacillus brantae</i> DSM 23927                                 | A0A0R2B010 | 363 |
|         |                                                                        | A0A0R2B0A6 | 346 |
| 1423729 | <i>Lactobacillus cacaonum</i> DSM 21116                                | A0A0R2CW19 | 360 |
| 1423730 | <i>Lactobacillus camelliae</i> DSM 22697 = JCM 13995                   | A0A0R2ERE5 | 362 |
|         |                                                                        | A0A0R2F552 | 360 |
| 1122146 | <i>Lactobacillus ceti</i> DSM 22408                                    | A0A0R2KJ20 | 363 |
| 1423734 | <i>Lactobacillus composti</i> DSM 18527 = JCM 14202                    | X0PU41     | 363 |
| 1423735 | <i>Lactobacillus concavus</i> DSM 17758                                | A0A0R1W3V6 | 391 |
| 1185325 | <i>Lactobacillus coryniformis</i> subsp. <i>coryniformis</i> CECT 5711 | J3JB76     | 356 |
|         |                                                                        | J3JCC0     | 363 |
| 748671  | <i>Lactobacillus crispatus</i> ST1                                     | D5GY45     | 364 |
|         |                                                                        | D5GZ81     | 345 |
|         |                                                                        | D5H022     | 352 |
| 1423738 | <i>Lactobacillus dextrinicus</i> DSM 20335                             | A0A0R2BHL7 | 365 |
| 1400520 | <i>Lactobacillus fabifermentans</i> T30PCM01                           | W6T5Z8     | 363 |
|         |                                                                        | W6TBY3     | 363 |
| 1612    | <i>Lactobacillus farciminis</i>                                        | A0A0H4LFI1 | 345 |
|         |                                                                        | A0A0H4LHP9 | 361 |
|         |                                                                        | A0A0H4LQL8 | 362 |
| 1423747 | <i>Lactobacillus fuchuensis</i> DSM 14340 = JCM 11249                  | A0A0R1RTV4 | 352 |
|         |                                                                        | A0A0R1RWR1 | 364 |
| 1423750 | <i>Lactobacillus ghanensis</i> DSM 18630                               | A0A0R1VEP2 | 346 |
| 1007676 | <i>Lactobacillus ginsenosidimutans</i>                                 | A0A0H4QF39 | 348 |
| 1423754 | <i>Lactobacillus hamsteri</i> DSM 5661 = JCM 6256                      | A0A0R1YEU2 | 353 |
|         |                                                                        | A0A0R1YFJ6 | 347 |
| 1122147 | <i>Lactobacillus harbinensis</i> DSM 16991                             | A0A0R1X7N9 | 340 |
|         |                                                                        | A0A0R1XDB5 | 364 |
| 405566  | <i>Lactobacillus helveticus</i> DPC 4571                               | A8YTK6     | 288 |
| 1423758 | <i>Lactobacillus hominis</i> DSM 23910 = CRBIP 24.179                  | I7L771     | 363 |
| 525329  | <i>Lactobacillus jensenii</i> JV-V16                                   | D6S2F6     | 344 |
| 257314  | <i>Lactobacillus johnsonii</i> NCC 533                                 | Q74HC9     | 356 |
|         |                                                                        | Q74HL9     | 345 |

|         |                                                                   |            |     |
|---------|-------------------------------------------------------------------|------------|-----|
| 1423763 | <i>Lactobacillus kalixensis</i> DSM 16043                         | A0A0R1UAV3 | 352 |
| 267818  | <i>Lactobacillus kefiranofaciens</i>                              | A0A1G5UVH1 | 370 |
|         |                                                                   | A0A1G5X7P2 | 345 |
|         |                                                                   | A0A1G5WAB0 | 352 |
| 1423769 | <i>Lactobacillus manihotivorans</i> DSM 13343 = JCM 12514         | A0A0R1QH79 | 362 |
|         |                                                                   | A0A0R1RFU7 | 371 |
| 1218508 | <i>Lactobacillus mellis</i>                                       | A0A0F4L0G6 | 365 |
| 1423770 | <i>Lactobacillus mindensis</i> DSM 14500                          | A0A0R1QM29 | 356 |
| 1291734 | <i>Lactobacillus nasuensis</i> JCM 17158                          | A0A0R1JIN1 | 351 |
|         |                                                                   | A0A0R1JZ64 | 343 |
| 1423775 | <i>Lactobacillus nodensis</i> DSM 19682 = JCM 14932 = NBRC 107160 | A0A0R1KB17 | 348 |
|         |                                                                   | A0A0R1KB58 | 363 |
| 1423777 | <i>Lactobacillus oeni</i> DSM 19972                               | A0A0R1MB04 | 367 |
|         |                                                                   | A0A0R1MF18 | 362 |
| 321967  | <i>Lactobacillus paracasei</i> ATCC 334                           | Q033U5     | 366 |
|         |                                                                   | Q036P6     | 366 |
| 1423790 | <i>Lactobacillus pasteurii</i> DSM 23907 = CRBIP 24.76            | I7IYW9     | 342 |
|         |                                                                   | I7JY07     | 336 |
|         |                                                                   | I7KKV2     | 363 |
|         |                                                                   | I7LAD2     | 261 |
| 1423792 | <i>Lactobacillus perolens</i> DSM 12744                           | A0A0R1N3K0 | 362 |
| 1590    | <i>Lactobacillus plantarum</i>                                    | A0A0M4RAV6 | 363 |
|         |                                                                   | A0A0M4SAG9 | 364 |
|         |                                                                   | A0A0M5M5C6 | 362 |
| 220668  | <i>Lactobacillus plantarum</i> WCFS1                              | F9URN7     | 363 |
|         |                                                                   | F9UT47     | 364 |
|         |                                                                   | F9UUh6     | 362 |
|         |                                                                   | F9UUI8     | 351 |
| 449659  | <i>Lactobacillus pobuzihii</i>                                    | A0A0R2L1C3 | 351 |
|         |                                                                   | A0A0R2L8D6 | 363 |
| 1423796 | <i>Lactobacillus rennini</i> DSM 20253                            | A0A0R2D3K4 | 363 |
|         |                                                                   | A0A0R2D8G5 | 342 |
| 314315  | <i>Lactobacillus sakei</i> subsp. <i>sakei</i> 23K                | Q38WT3     | 364 |
| 1293598 | <i>Lactobacillus saniviri</i> JCM 17471 = DSM 24301               | A0A0R2MPE1 | 356 |
|         |                                                                   | A0A0R2MXW5 | 362 |
| 1423801 | <i>Lactobacillus satsumensis</i> DSM 16230 = JCM 12392            | A0A0R1UZE1 | 361 |
| 81857   | <i>Lactobacillus selangorensis</i>                                | A0A0R2G744 | 363 |
| 1291052 | <i>Lactobacillus sharpeae</i> JCM 1186 = DSM 20505                | A0A0R1ZIU1 | 351 |
|         |                                                                   | A0A0R1ZX01 | 371 |
| 1231336 | <i>Lactobacillus shenzhenensis</i> LY-73                          | U4TPC8     | 363 |
|         |                                                                   | U4TZH2     | 341 |
| 97137   | <i>Lactobacillus</i> sp. ASF360                                   | N1ZM26     | 341 |
| 1545702 | <i>Lactobacillus</i> sp. wkb8                                     | A0A089Y2K6 | 365 |
|         |                                                                   | A0A089Y639 | 351 |
|         |                                                                   | A0A089ZL45 | 364 |

|         |                                                            |            |     |
|---------|------------------------------------------------------------|------------|-----|
| 1423810 | <i>Lactobacillus thailandensis</i> DSM 22698 = JCM 13996   | A0A0R2C675 | 334 |
| 1133569 | <i>Lactobacillus vini</i> DSM 20605                        | A0A0R2C441 | 360 |
| 942150  | <i>Lactobacillus xiangfangensis</i>                        | A0A0R2M1D1 | 363 |
|         |                                                            | A0A0R2MKD9 | 346 |
| 420890  | <i>Lactococcus garvieae</i> Lg2                            | F9VC15     | 353 |
|         |                                                            | F9VDF4     | 365 |
| 272623  | <i>Lactococcus lactis</i> subsp. <i>lactis</i> II1403      | Q9CGG7     | 353 |
|         |                                                            | Q9CJ33     | 364 |
| 297352  | <i>Lactococcus piscium</i> MKFS47                          | A0A0D6DXT8 | 364 |
|         |                                                            | A0A0D6E077 | 367 |
| 1215915 | <i>Lactococcus raffinolactis</i> 4877                      | I7LNF6     | 363 |
|         |                                                            | I7LPM3     | 299 |
|         |                                                            | I7LQD5     | 353 |
| 596323  | <i>Leptotrichia goodfellowii</i> F0264                     | D0GMP0     | 362 |
|         |                                                            | D0GNG4     | 358 |
| 634994  | <i>Leptotrichia hofstadii</i> F0254                        | C9MWS7     | 292 |
| 1785996 | <i>Leptotrichia</i> sp. oral taxon 847                     | A0A0X8JUT5 | 363 |
| 1265818 | <i>Listeria aquatica</i> FSL S10-1188                      | W7AWB9     | 362 |
| 1265820 | <i>Listeria cornellensis</i> FSL F6-0969                   | W7BQE4     | 361 |
|         |                                                            | W7BSB9     | 362 |
| 1081736 | <i>Listeria fleischmannii</i> subsp. <i>coloradonensis</i> | H7F450     | 375 |
|         |                                                            | H7F7U1     | 352 |
| 1265817 | <i>Listeria floridensis</i> FSL S10-1187                   | W7C960     | 362 |
| 525367  | <i>Listeria grayi</i> DSM 20601                            | D7UU60     | 360 |
|         |                                                            | D7UW40     | 368 |
|         |                                                            | D7V074     | 353 |
| 169963  | <i>Listeria monocytogenes</i> EGD-e                        | Q8Y6G8     | 362 |
| 1265846 | <i>Listeria rocourtiae</i> FSL F6-920                      | W7D3V2     | 362 |
|         |                                                            | W7D7L0     | 235 |
|         |                                                            | W7DQM0     | 361 |
| 1497679 | <i>Listeriaceae bacterium</i> FSL A5-0209                  | A0A099W1R7 | 353 |
|         |                                                            | A0A099W4B5 | 362 |
|         |                                                            | A0A099WK82 | 361 |
| 1293441 | <i>Lysinibacillus contaminans</i>                          | A0A0M8Q8B7 | 360 |
| 1220589 | <i>Lysinibacillus odysseyi</i> 34hs-1 = NBRC 100172        | A0A0A3IF92 | 360 |
| 1145276 | <i>Lysinibacillus varians</i>                              | X2GVB2     | 360 |
| 1122219 | <i>Megasphaera cerevisiae</i> DSM 20462                    | A0A0J6WZP9 | 360 |
| 1064535 | <i>Megasphaera elsdenii</i> DSM 20460                      | G0VN95     | 360 |
| 706434  | <i>Megasphaera micronuciformis</i> F0359                   | E2ZBK6     | 359 |
| 1111454 | <i>Megasphaera</i> sp. BV3C16-1                            | U7UVK7     | 368 |
| 537288  | <i>Megasphaera</i> sp. DJF_B143                            | A0A124EFZ1 | 360 |
| 1603888 | <i>Megasphaera</i> sp. MJR8396C                            | A0A133SGN2 | 360 |
| 940190  | <i>Melissococcus plutonius</i> ATCC 35311                  | F3Y8J1     | 353 |
|         |                                                            | F3YB62     | 363 |
| 1344956 | <i>Microbacterium</i> sp. TS-1                             | U2XPM0     | 360 |
| 500635  | <i>Mitsuokella multacida</i> DSM 20544                     | C9KL95     | 377 |

|         |                                                                  |            |     |
|---------|------------------------------------------------------------------|------------|-----|
| 36809   | <i>Mycobacteroides abscessus</i>                                 | A0A0U1AD61 | 363 |
|         |                                                                  | A0A0U1AK52 | 362 |
|         |                                                                  | A0A0U1AZR6 | 369 |
| 1034808 | <i>Mycoplasma anatis</i> 1340                                    | F9QDW7     | 363 |
| 29556   | <i>Mycoplasma gallinaceum</i>                                    | A0A0D5ZJ39 | 362 |
| 1048830 | <i>Mycoplasma iowae</i> 695                                      | G4EL66     | 372 |
| 221109  | <i>Oceanobacillus iheyensis</i> HTE831                           | Q8ESL1     | 357 |
| 545501  | <i>Oceanobacillus oncorhynchi</i>                                | A0A0A1M9C7 | 362 |
|         |                                                                  | A0A0A1MUU9 | 357 |
| 203123  | <i>Oenococcus oeni</i> PSU-1                                     | Q04GV5     | 361 |
| 1125712 | <i>Olsenella profusa</i> F0195                                   | U2TIP4     | 366 |
|         |                                                                  | U2UUL8     | 361 |
|         |                                                                  | U2V5M7     | 365 |
| 697284  | <i>Paenibacillus larvae</i> subsp. <i>larvae</i> DSM 25430       | V9WA07     | 302 |
| 1073571 | <i>Paenibacillus riograndensis</i> SBR5                          | A0A0E4CYF2 | 349 |
| 1227352 | <i>Paenibacillus</i> sp. FSL R7-277                              | W4CNH8     | 350 |
| 1505    | <i>Paeniclostridium sordellii</i>                                | A0A0A1SIA6 | 363 |
| 1292036 | <i>Paeniclostridium sordellii</i> ATCC 9714                      | T0CNG7     | 206 |
| 1220594 | <i>Parageobacillus caldodoxylosilyticus</i> NBRC 107762          | A0A023DJV8 | 355 |
| 153151  | <i>Parageobacillus toebii</i>                                    | A0A150N081 | 356 |
| 862514  | <i>Pediococcus acidilactici</i> DSM 20284                        | E0NG57     | 365 |
|         |                                                                  | E0NHJ0     | 371 |
| 480391  | <i>Pediococcus argentinicus</i>                                  | A0A0R2NA43 | 363 |
| 319652  | <i>Pediococcus cellicola</i>                                     | A0A0R2IQE3 | 365 |
|         |                                                                  | A0A0R2IUE5 | 361 |
| 701521  | <i>Pediococcus claussenii</i> ATCC BAA-344                       | G8PBE2     | 362 |
| 51663   | <i>Pediococcus damnosus</i>                                      | A0A0R2HFB0 | 361 |
|         |                                                                  | A0A2G9VFL4 | 356 |
| 278197  | <i>Pediococcus pentosaceus</i> ATCC 25745                        | Q03HJ1     | 363 |
| 484770  | <i>Pelosinus</i> sp. UFO1                                        | A0A075KAY3 | 363 |
| 1655638 | <i>Peptococcaceae bacterium</i> 1109                             | A0A0J1DKH8 | 374 |
| 999898  | <i>Peptococcaceae bacterium</i> CEB3                             | A0A0J1FGG8 | 366 |
| 658445  | <i>Photobacterium gaetbulicola</i> Gung47                        | A0A0C5WQ52 | 365 |
| 1526927 | <i>Planococcus</i> sp. PAMC 21323                                | A0A0B4R8G0 | 350 |
| 1385512 | <i>Pontibacillus litoralis</i> JSM 072002                        | A0A0A5G0J7 | 361 |
| 411467  | <i>Pseudoflavonifractor capillosus</i> ATCC 29799                | A6NTC6     | 351 |
|         |                                                                  | A6NYD7     | 368 |
| 1671366 | <i>Ruminococcus</i> sp. DSM 100440                               | A0A150Y881 | 362 |
| 526218  | <i>Sebaldella termitidis</i> ATCC 33386                          | D1AG48     | 342 |
|         |                                                                  | D1AK78     | 361 |
|         |                                                                  | D1APW7     | 363 |
| 927704  | <i>Selenomonas ruminantium</i> subsp. <i>lactilytica</i> TAM6421 | I0GRB2     | 356 |
|         |                                                                  | I0GTZ3     | 357 |
| 546271  | <i>Selenomonas sputigena</i> ATCC 35185                          | F4EUM5     | 361 |
| 706433  | <i>Solobacterium moorei</i> F0204                                | E7MMB3     | 349 |
|         |                                                                  | E7MQV6     | 362 |

|         |                                                                               |            |     |
|---------|-------------------------------------------------------------------------------|------------|-----|
| 1276258 | <i>Spiroplasma apis</i> B31                                                   | V5RHY0     | 368 |
| 1276246 | <i>Spiroplasma culicicola</i> AES-1                                           | W6A6J9     | 366 |
|         |                                                                               | W6A6T4     | 366 |
|         |                                                                               | W6A7P9     | 368 |
| 1276221 | <i>Spiroplasma diminutum</i> CUAS-1                                           | S5LZ98     | 367 |
|         |                                                                               | S5M045     | 372 |
| 216942  | <i>Spiroplasma litorale</i>                                                   | A0A0K1W1G6 | 367 |
| 570509  | <i>Spiroplasma melliferum</i> KC3                                             | A0A037UPA3 | 369 |
| 838561  | <i>Spiroplasma mirum</i> ATCC 29335                                           | W0GP22     | 209 |
| 2138    | <i>Spiroplasma poulsonii</i>                                                  | A0A2P6FEQ4 | 263 |
| 1276257 | <i>Spiroplasma sabaudiense</i> Ar-1343                                        | W6AA03     | 363 |
|         |                                                                               | W6AAV3     | 367 |
|         |                                                                               | W6AKH8     | 366 |
|         |                                                                               | W6AKP1     | 368 |
| 1276229 | <i>Spiroplasma syrphidicola</i> EA-1                                          | R4U566     | 372 |
|         |                                                                               | R4U6S7     | 346 |
| 1069536 | <i>Sporolactobacillus inulinus</i> CASD                                       | A0A0U1QNE3 | 359 |
| 1476    | <i>Sporosarcina psychrophila</i>                                              | A0A127VUS9 | 359 |
|         |                                                                               | A0A127W2H8 | 355 |
| 1413510 | <i>Staphylococcus aureus</i> C0673                                            | A0A033UGY8 | 365 |
|         |                                                                               | A0A033UPE9 | 349 |
| 93061   | <i>Staphylococcus aureus</i> subsp. <i>aureus</i> NCTC 8325                   | Q2G1G7     | 346 |
| 367830  | <i>Staphylococcus aureus</i> subsp. <i>aureus</i> USA300                      | A0A0H2XHV5 | 351 |
| 396513  | <i>Staphylococcus carnosus</i> subsp. <i>carnosus</i> TM300                   | B9DJX5     | 354 |
| 176279  | <i>Staphylococcus epidermidis</i> RP62A                                       | Q5HLT4     | 350 |
| 28035   | <i>Staphylococcus lugdunensis</i>                                             | A0A133QAT3 | 349 |
| 1229783 | <i>Staphylococcus massiliensis</i> S46                                        | K9ANW1     | 348 |
| 904314  | <i>Staphylococcus pettenkoferi</i> VCU012                                     | H0DFP6     | 349 |
| 342451  | <i>Staphylococcus saprophyticus</i> subsp. <i>saprophyticus</i><br>ATCC 15305 | Q49ZN5     | 349 |
| 1262969 | <i>Staphylococcus</i> sp. CAG:324                                             | R6T6U8     | 345 |
| 553483  | <i>Streptococcus equi</i> subsp. <i>zooepidemicus</i> H70                     | C0MDB8     | 365 |
| 519441  | <i>Streptobacillus moniliformis</i> DSM 12112                                 | D1AYQ8     | 338 |
| 1154860 | <i>Streptococcus agalactiae</i> LMG 14747                                     | V6YYS5     | 364 |
| 1273539 | <i>Streptococcus iniae</i> IUSA1                                              | V4QPY2     | 361 |
| 862967  | <i>Streptococcus intermedius</i> B196                                         | T1ZC60     | 351 |
| 1811193 | <i>Streptococcus pantholopis</i>                                              | A0A172Q7B0 | 364 |
| 301447  | <i>Streptococcus pyogenes</i> serotype M1                                     | Q99Z98     | 364 |
| 1777879 | <i>Streptococcus</i> sp. DD11                                                 | A0A139P952 | 363 |
| 904294  | <i>Streptococcus</i> sp. oral taxon 056 str. F0418                            | F9HIJ1     | 363 |
| 391295  | <i>Streptococcus suis</i> 05ZYH33                                             | A4VXQ7     | 283 |
|         |                                                                               | A4VY54     | 369 |
| 218495  | <i>Streptococcus uberis</i> 0140J                                             | B9DU07     | 362 |
| 273057  | <i>Sulfolobus solfataricus</i> P2                                             | Q97YQ2     | 335 |
| 273063  | <i>Sulfurisphaera tokodaii</i> str. 7                                         | Q973N4     | 344 |
| 1209989 | <i>Tepidanaerobacter acetatoxydans</i> Re1                                    | F4LRX5     | 361 |
| 224999  | <i>Tepidanaerobacter syntrophicus</i>                                         | A0A0U9HJR7 | 362 |

|         |                                                          |            |     |
|---------|----------------------------------------------------------|------------|-----|
| 586416  | <i>Terribacillus aidingensis</i>                         | A0A075LNS0 | 350 |
| 945021  | <i>Tetragenococcus halophilus</i> NBRC 12172             | G4L492     | 358 |
|         |                                                          | G4L7Y6     | 363 |
| 1302648 | <i>Tetragenococcus muriaticus</i> 3MR10-3                | A0A091BZM9 | 360 |
|         |                                                          | A0A091BZZ2 | 215 |
| 644966  | <i>Thermaerobacter marianensis</i> DSM 12885             | E6SHP2     | 377 |
| 1535750 | <i>Thermoactinomyces</i> sp. Gus2-1                      | A0A094JKW4 | 361 |
| 2026    | <i>Thermoactinomyces vulgaris</i>                        | A0A0N0YA19 | 364 |
| 1094508 | <i>Thermoanaerobacterium saccharolyticum</i> JW/SL-YS485 | I3VRJ7     | 360 |
|         |                                                          | I3VRK3     | 363 |
| 1321815 | <i>Treponema lecithinolyticum</i> ATCC 700332            | U2M3T0     | 348 |
| 754027  | <i>Treponema phagedenis</i> F0421                        | E7NSM7     | 345 |
| 36087   | <i>Trichuris trichiura</i>                               | A0A077ZK10 | 626 |
| 1408226 | <i>Vagococcus lutrae</i> LBD1                            | V6Q5P2     | 363 |
|         |                                                          | V6Q6J4     | 371 |
| 1462526 | <i>Virgibacillus massiliensis</i>                        | A0A024QGD1 | 347 |
| 1473    | <i>Virgibacillus pantothenicus</i>                       | A0A0L0QKK4 | 365 |
|         |                                                          | A0A0L0QN84 | 360 |
|         |                                                          | A0A0L0QPQ2 | 356 |
| 1227360 | <i>Viridibacillus arenosi</i> FSL R5-213                 | W4ERI8     | 365 |
| 137591  | <i>Weissella cibaria</i>                                 | A0A0D1LJQ4 | 365 |
| 1127131 | <i>Weissella confusa</i> LBAE C39-2                      | H1X9R4     | 365 |
| 1777865 | <i>Weissella</i> sp. DD23                                | A0A139QLE2 | 365 |
| 994573  | <i>Youngiibacter fragilis</i> 232.1                      | V7I739     | 348 |

**References**

- Bae, T., and Schneewind, O. (2006). Allelic replacement in *Staphylococcus aureus* with inducible counter-selection. *Plasmid* 55, 58-63.
- Borisova, M., Gaupp, R., Duckworth, A., Schneider, A., Dalügge, D., Mühleck, M., Deubel, D., Unsleber, S., Yu, W., Muth, G., Bischoff, M., Götz, F., and Mayer, C. (2016). Peptidoglycan recycling in Gram-positive bacteria is crucial for survival in stationary phase. *mBio* 7, e00923-00916.
- Ebner, P., Prax, M., Nega, M., Koch, I., Dube, L., Yu, W., Rinker, J., Popella, P., Flötenmeyer, M., and Götz, F. (2015). Excretion of cytoplasmic proteins (ECP) in *Staphylococcus aureus*. *Mol Microbiol* 97, 775-789.
- Fey, P.D., Endres, J.L., Yajjala, V.K., Widhelm, T.J., Boissy, R.J., Bose, J.L., and Bayles, K.W. (2013). A genetic resource for rapid and comprehensive phenotype screening of nonessential *Staphylococcus aureus* genes. *MBio* 4, e00537-00512.
- Geiger, T., Francois, P., Liebeke, M., Fraunholz, M., Goerke, C., Krismer, B., Schrenzel, J., Lalk, M., and Wolz, C. (2012). The stringent response of *Staphylococcus aureus* and its impact on survival after phagocytosis through the induction of intracellular PSMs expression. *PLoS Pathog* 8, e1003016.
- Gibson, D.G., Young, L., Chuang, R.Y., Venter, J.C., Hutchison, C.A., 3rd, and Smith, H.O. (2009). Enzymatic assembly of DNA molecules up to several hundred kilobases. *Nat Methods* 6, 343-345.
- Hanahan, D. (1983). Studies on transformation of *Escherichia coli* with plasmids. *J Mol Biol* 166, 557-580.
- Löfblom, J., Kronqvist, N., Uhlén, M., Ståhl, S., and Wernérus, H. (2007). Optimization of electroporation-mediated transformation: *Staphylococcus carnosus* as model organism. *J Appl Microbiol* 102, 736-747.
- Monk, I.R., Shah, I.M., Xu, M., Tan, M.W., and Foster, T.J. (2012). Transforming the untransformable: application of direct transformation to manipulate genetically *Staphylococcus aureus* and *Staphylococcus epidermidis*. *MBio* 3.
- Studier, F.W., and Moffat, B.A. (1986). Use of bacteriophage T7 RNA polymerase to direct selective high-level expression of cloned genes. *Mol. Biol.* 189, 113-130.
